# Supplementary material for: Relationship between outer retinal tubulation, retinal volume, and visual field in Bietti crystalline dystrophy
Source: Springer Nature journal article supplement (doi:10.1007/s00417-025-06742-8), 2025-01-31
Supplement: MOESM1 [file 417_2025_6742_MOESM1_ESM.pdf]

**Supplementary Table S1. *CYP4V2* mutations in patients**

| <b>N</b> | <b>Mutation 1</b>   | <b>Mutation 2</b>   |
|----------|---------------------|---------------------|
| 20       | c.802-8_810delinsGC | c.802-8_810delinsGC |
| 1        | c.518T>G            | c.518T>G            |
| 1        | c.802-8_810delinsGC | c.219T>A            |
| 1        | c.802-8_810delinsGC | c.327+1G>A          |
| 1        | c.802-8_810delinsGC | c.1020G>A           |
| 2        | c.802-8_810delinsGC | c.1090G>A           |
| 2        | c.802-8_810delinsGC | c.1091-2A>G         |
| 1        | c.802-8_810delinsGC | c.1199G>A           |
| 2        | c.802-8_810delinsGC | c.1226-6_1235del    |
| 2        | c.802-8_810delinsGC | c.518T>G            |
| 1        | c.802-8_810delinsGC | c.1378T>C           |
| 1        | c.1091-2A>G         | c.992A>C            |

In two patients, *CYP4V2* mutations were confirmed through genetic testing conducted at other institutions; however, the specific details of the mutations are unknown.

Supplementary Figure S1

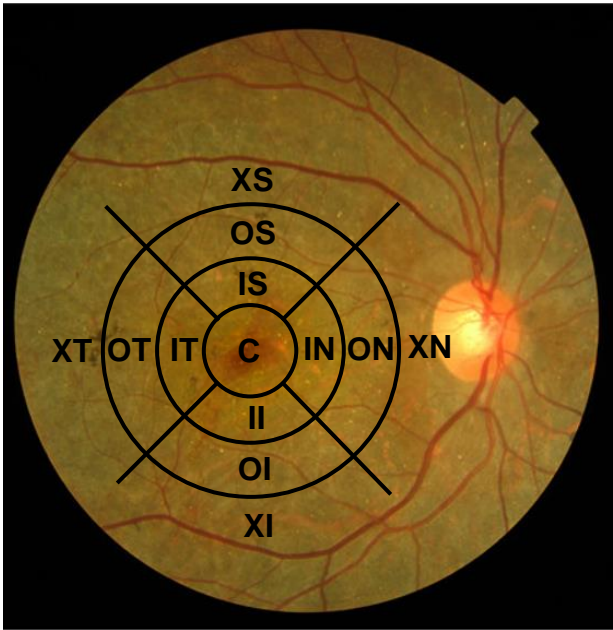

|             |              |
|-------------|--------------|
| C : Center  | T : Temporal |
| I : Inner   | I : Inferior |
| O : Outer   | N : Nasal    |
| X : Outside | S : Superior |

**Supplemental Figure S1.**  
**Measurement of the tubulation number and retinal volume.**

The distribution of tubulations and retinal volume was evaluated using the Early Treatment Diabetic Retinopathy Study (ETDRS) grid. Retinal volume was measured in the following regions: the area between 3 mm and 6 mm in diameter corresponding to the outer volume (labeled as O), the area between 1 mm and 3 mm in diameter corresponding to the inner volume (labeled as I), and the central area within 1 mm in diameter corresponding to the center volume (labeled as C). Additionally, X indicates the area outside the 6 mm circle; T, I, N, and S denote temporal, inferior, nasal, and superior quadrants, respectively.
